# Supplementary material for: Locus specific epigenetic modalities of random allelic expression imbalance
Source: PubMed Central journal article supplement (PMC8429725; doi:10.1038/s41467-021-25630-3), 2021-09-09
Supplement: 41467_2021_25630_MOESM1_ESM.pdf [file 41467_2021_25630_MOESM1_ESM.pdf]

## **Locus specific epigenetic modalities of random allelic expression imbalance**

Lucile Marion-Poll, Benjamin Forêt, Dina Zielinski, Florian Massip, Mikael Attia, Ava C Carter, Laurène Syx, Howard Y Chang, Anne-Valerie Gendrel, Edith Heard

### **DESCRIPTION OF SUPPLEMENTARY INFORMATION:**

**Supplementary Figure 1:** RT-qPCR of pluripotency markers and differentiation markers

**Supplementary Figure 2:** BIC criterion calculated for each gene for the Gaussian mixture models

**Supplementary Figure 3:** Schematic of the differentiation of NPC clones into populations of astrocytes

**Supplementary Figure 4:** Cumulative distributions for each of the six independent differentiation experiments

**Supplementary Figure 5:** Western blot analysis of BAG3 protein expression levels

**Supplementary Figure 6:** Local regulation of allelic imbalance

**Supplementary Table 1:** Number of NPC clones generated for each differentiation experiment

**Supplementary Table 2:** P-values of the likelihood ratio tests

**Supplementary Table 3:** Bootstrap estimates of the parameters

**Supplementary Table 4:** List of clones used for sequencing

**Supplementary Table 5:** List of compounds used in the screen

**Supplementary Table 6:** List of pyrosequencing primers

**Supplementary Table 7:** List of qPCR primers

**Supplementary Table 8:** List of bisulfite primers

## SUPPLEMENTARY FIGURES

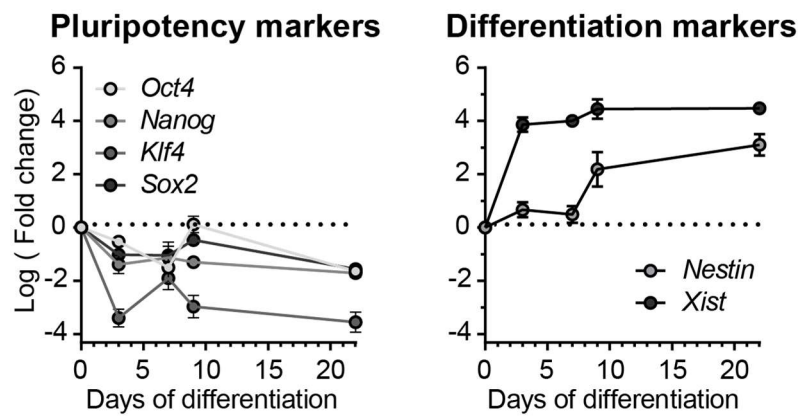

**Supplementary Fig. 1**

RT-qPCR of pluripotency markers and differentiation markers during the differentiation of ESCs towards NPCs. Data are means  $\pm$  SEM (n = 4 replicates per condition).

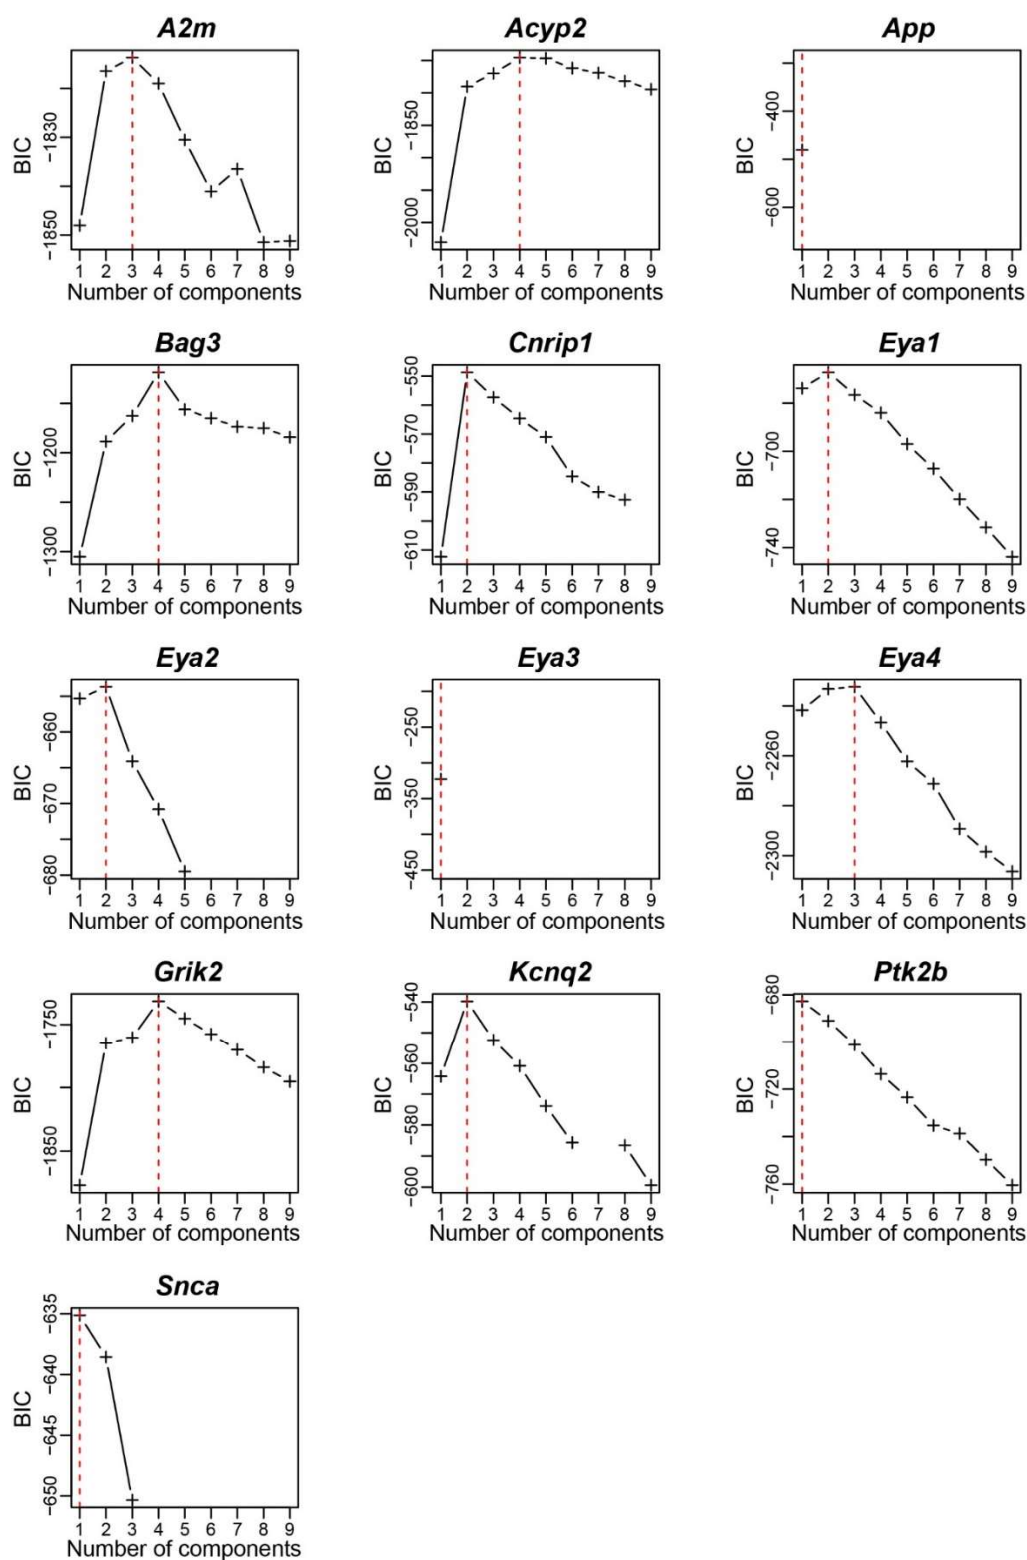

**Supplementary Fig. 2**

BIC criterion calculated for each gene for the Gaussian mixture models, with up to 9 components. The red dashed lines indicate the number of components maximizing the BIC criterion. For certain values of the number of components, the EM algorithm did not converge and therefore, the BIC could not be estimated (e.g., in the case of *Eya3* and *App*). This occurred when the variance in the empirical data was too small and no good solution could be found.

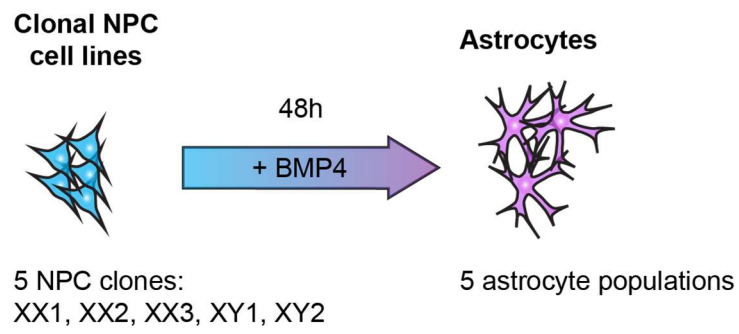

**Supplementary Fig. 3**

Experimental strategy to assess the stability of monoallelic expression after *in vitro* differentiation of 5 NPC clones into populations of astrocytes.

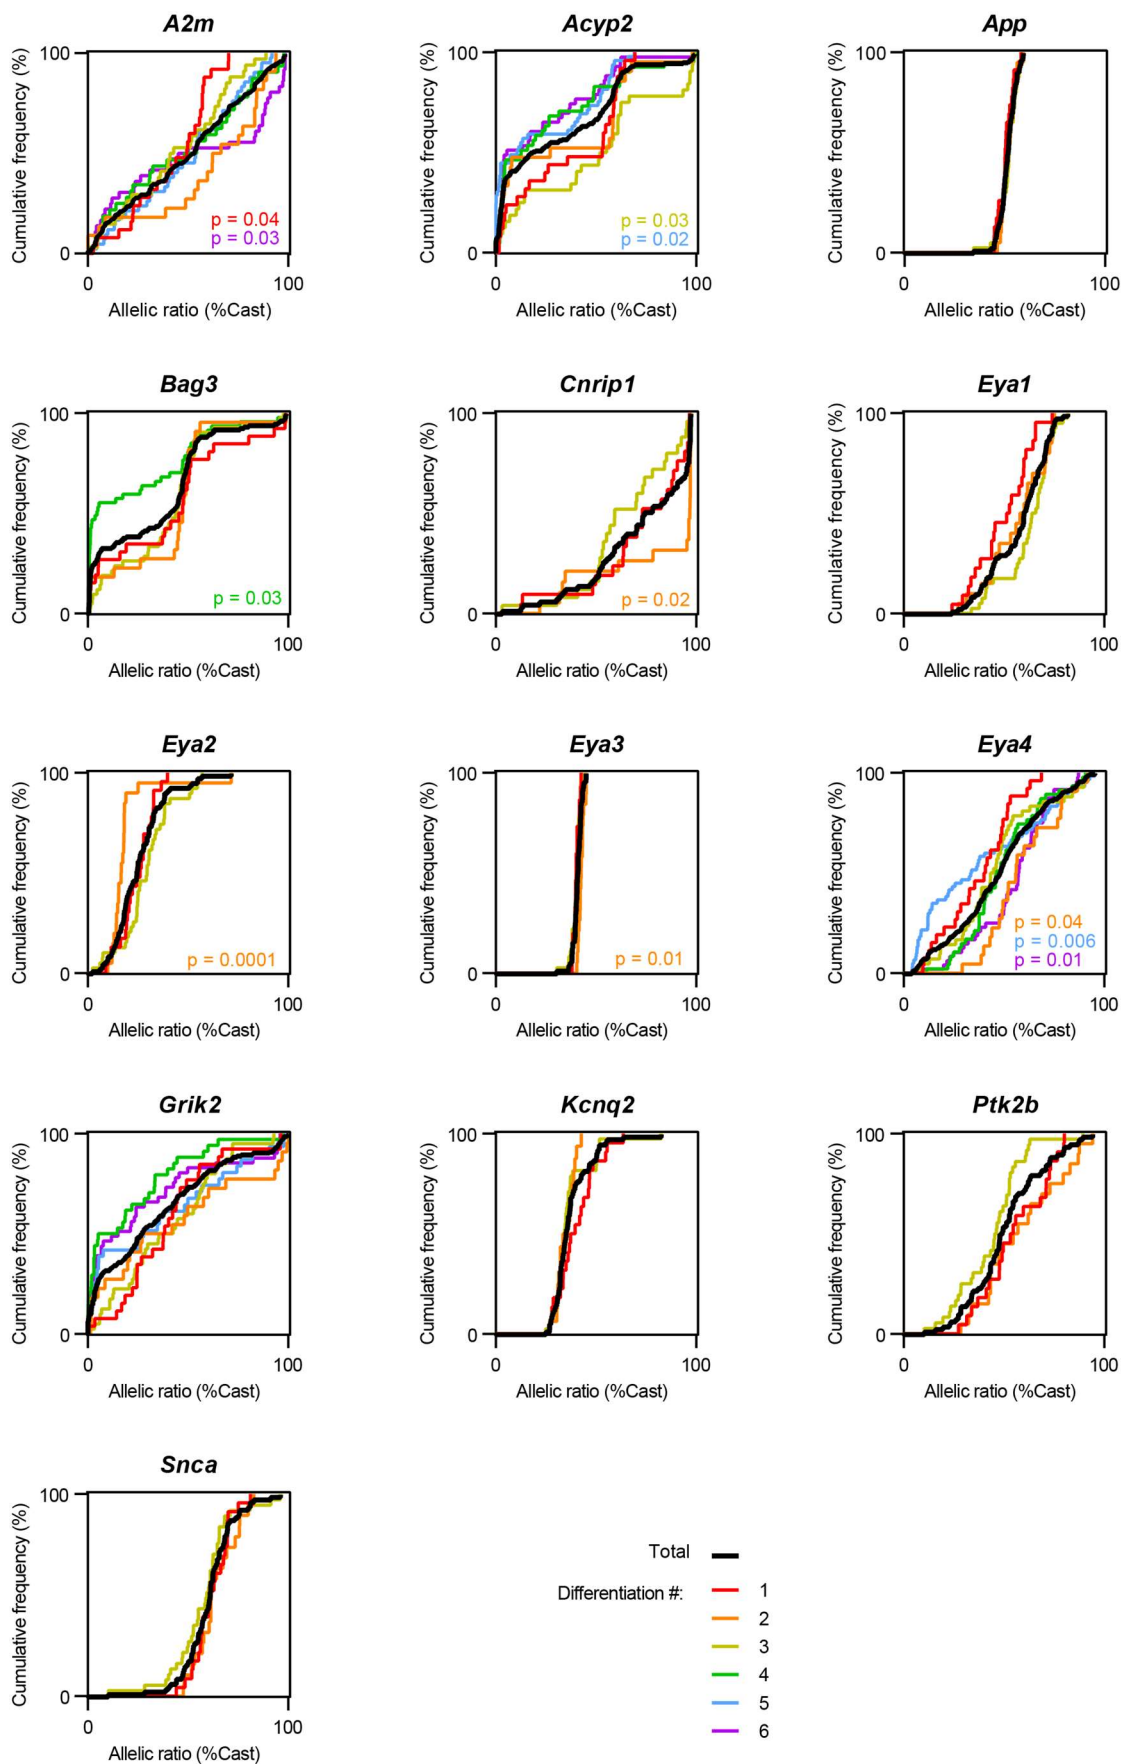

**Supplementary Fig. 4**

Cumulative distributions of allelic expression ratios for each gene of interest, in all NPC clones analysed (black lines), and each of the six independent differentiation experiments (colored lines). Kolmogorov-Smirnov tests, between the total cumulative distribution and the cumulative distribution associated with each experiment, without correction.

**a**

|                |      |      |      |      |      |      |      |      |     |      |     |
|----------------|------|------|------|------|------|------|------|------|-----|------|-----|
| Lane           | 1    | 2    | 3    | 4    | 5    | 6    | 7    | 8    | 9   | 10   | 11  |
| Clone          | 42   | 50   | 13   | 52   | 58   | 61   | 66   | 74   | 51  | 20   | 106 |
| Allelic status | Mono | Bi   | Bi   | Bi   | Mono | Mono | Mono | Mono | Bi  | Mono | Bi  |
| RNA level      | High | High | High | High | Low  | Low  | High | High | Low | Low  | Low |

**b**

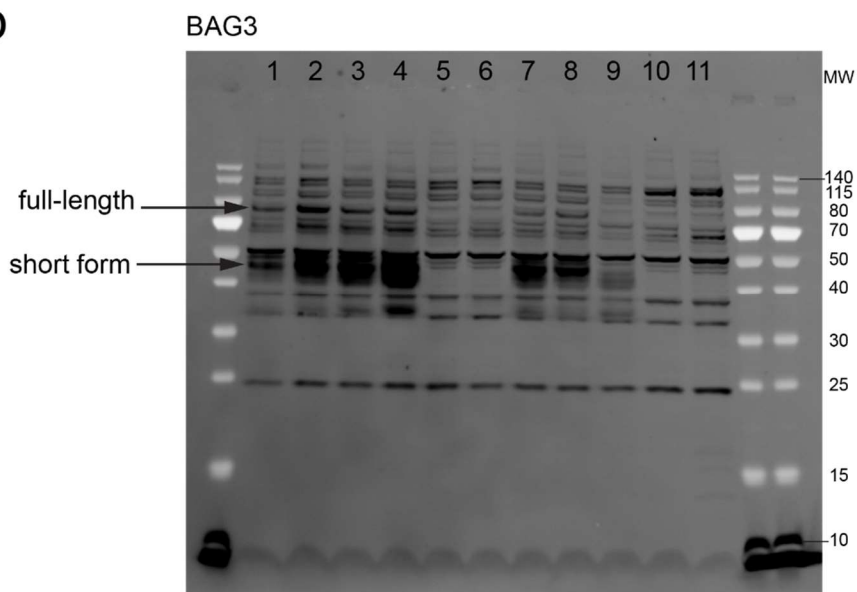

**c**

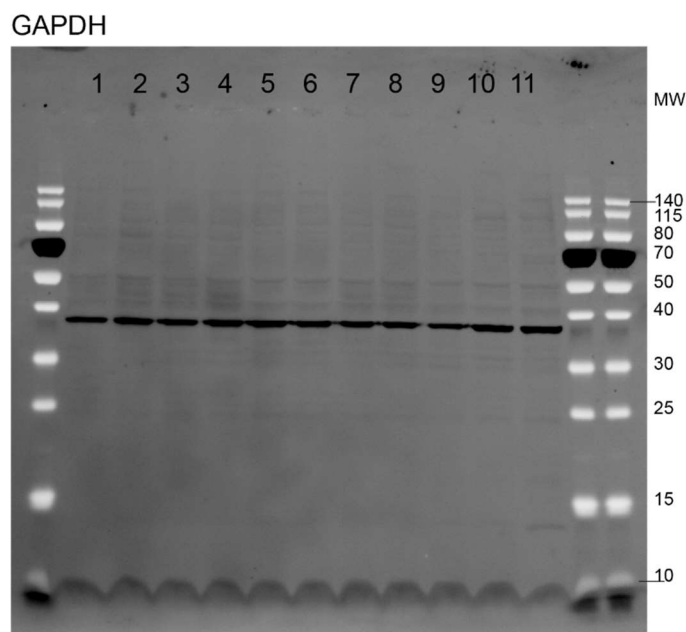

**Supplementary Fig. 5**

Western blot analysis of BAG3 protein expression levels. (a) Details of the 11 NPC clones analysed, characterized by high or low expression levels and mono- or biallelic expression. (b) Full image of the western blot with the BAG3 antibody. The full-length band was used for the quantification in Figure 5. (c) Full image of the western blot with the GAPDH antibody.

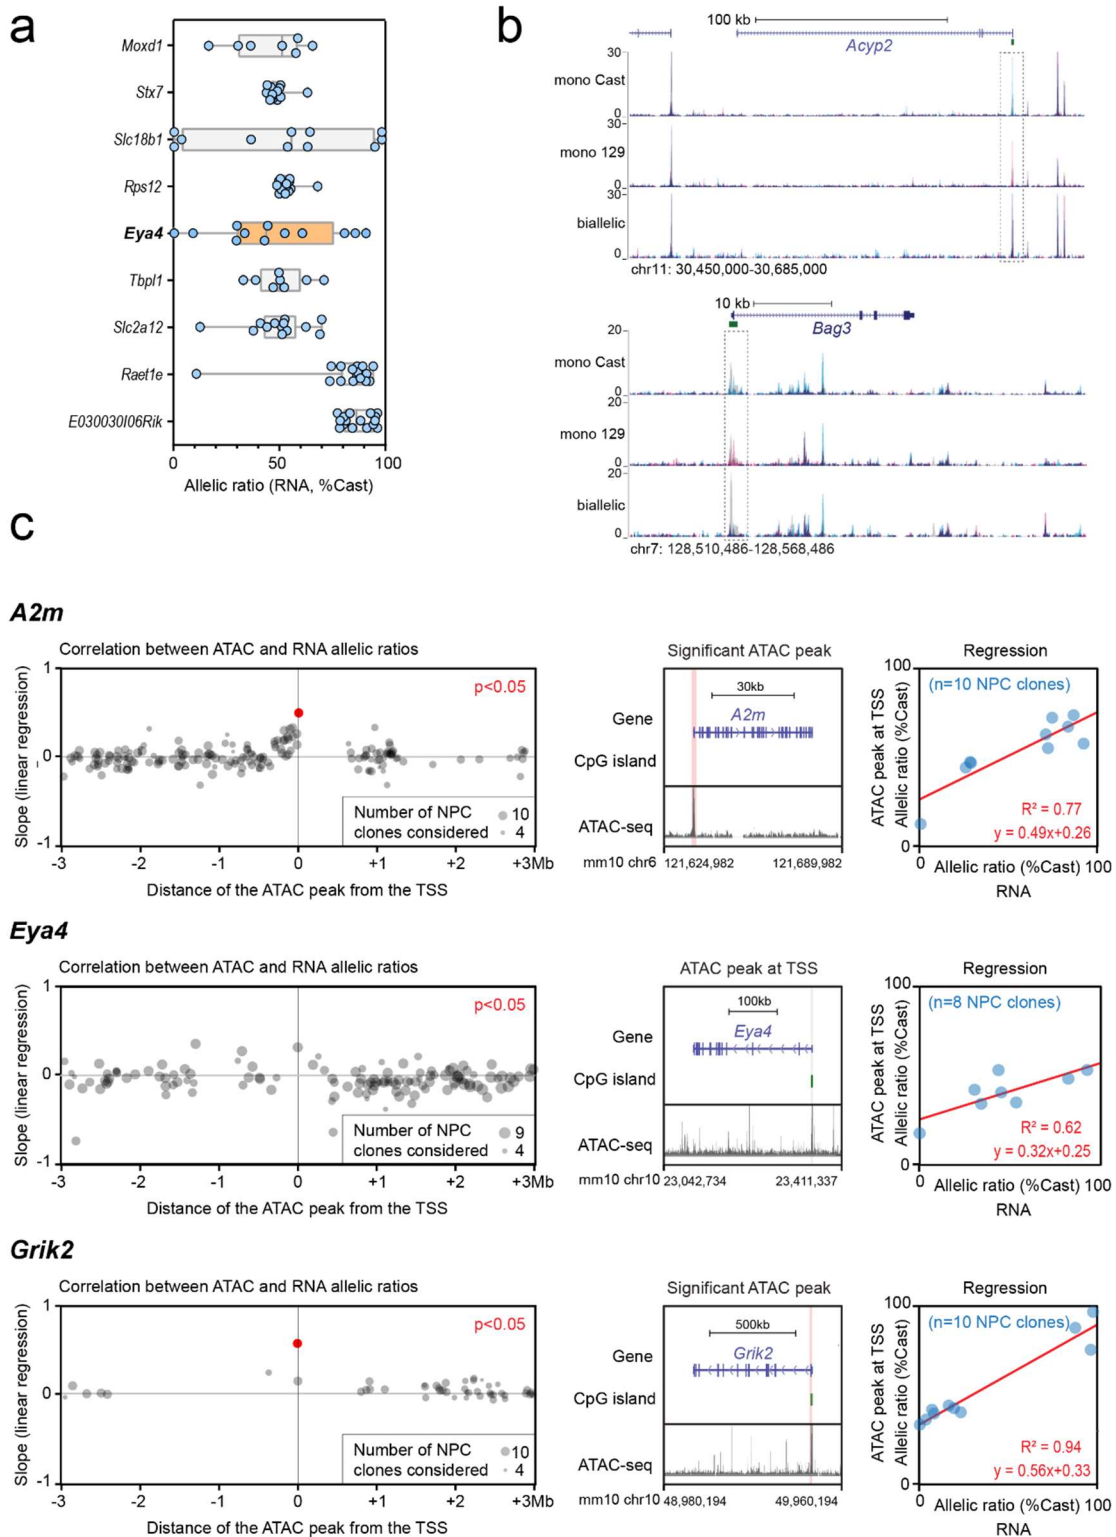

**Supplementary Fig. 6**

(a) Comparison of the distribution of allelic expression ratios for *Eya4*, with 4 upstream and 4 downstream neighbouring genes, measured by allele-specific RNA-seq in 16 NPC clones. Boxplot elements: center line represents the median, box bounds represent the 25th and 75th percentiles, whiskers represent the minimum and maximum. The orange color highlights the box plot of the RME gene of interest. (b) UCSC genome browser snapshots showing allele-specific ATAC-seq tracks for *Acyp2* and *Bag3* are shown for 3 representative clones (Cast-specific reads are shown in blue, 129-specific reads in pink, and non-allele specific reads in grey). Dashed grey boxes indicate the position of the random accessible monoallelic element for both genes. (c) Identification of the genomic region where allele-specific accessibility correlates best with expression for *A2m*, *Eya4* and *Grik2* by linear regression between the ATAC-seq allelic accessibility ratio and RNA-seq allelic expression ratio, for ATAC-seq peaks (containing at least a SNP) within a region of  $\pm 3$  megabases around the TSS. *P*value adjusted with Bonferroni correction, number of ATAC peaks: 176/128/47 *A2m/Eya4/Grik2* (left panels). Representative ATAC-seq track along the genes, with highlighting of the ATAC-seq peak, located at the TSS, that correlates significantly with the RNA-seq for *A2m* and *Grik2* (middle panels). Linear regression showing the correlation between the ATAC-seq allelic accessibility ratio and the RNA-seq allelic expression ratio at the TSS (right panels). ATAC-seq data and RNA-seq data from 13 NPC clones. *A2m*  $F_{(1,8)} = 27$ ,  $p = 8.5 \times 10^{-4}$ ; *Eya4*  $F_{(1,6)} = 9.6$ ,  $p = 0.021$ ; *Grik2*  $F_{(1,8)} = 120$ ,  $p = 4.3 \times 10^{-6}$

**SUPPLEMENTARY TABLES**

| ES cell line    | Differentiation n° | Number of NPC clones |
|-----------------|--------------------|----------------------|
| F123 (male)     | 1                  | 26                   |
| F123 (male)     | 2                  | 22                   |
| F121.6 (female) | 3                  | 42                   |
| F121.6 (female) | 4                  | 48                   |
| F121.6 (female) | 5                  | 61                   |
| F121.6 (female) | 6                  | 50                   |

**Supplementary Table 1: Number of NPC clones generated for each differentiation experiment.**

| Gene               | 1 vs 2 | 2 vs 3 | 3 vs 4 | 4 vs 5 |
|--------------------|--------|--------|--------|--------|
| <i>A2m</i> Cast    | 0.001  | 0.003  | 0.032  |        |
| <i>Acyp2</i> Cast  | 0.001  | 0.001  | 0.001  | 0.007  |
| <i>App</i> Cast    | NA     |        |        |        |
| <i>Bag3</i> Cast   | 0.001  | 0.001  | 0.001  | 0.983  |
| <i>Cnrip1</i> Cast | 0.001  | 0.368  |        |        |
| <i>Eya1</i> Cast   | 0.002  | 0.312  |        |        |
| <i>Eya2</i> Cast   | 0.007  | 0.366  |        |        |
| <i>Eya3</i> Cast   | NA     |        |        |        |
| <i>Eya4</i> Cast   | 0.099  | 0.001  | 0.395  |        |
| <i>Grik2</i> Cast  | 0.001  | 0.002  | 0.001  | 0.388  |
| <i>Kcnq2</i> Cast  | 0.001  | 0.822  |        |        |
| <i>Ptk2b</i> Cast  | 0.405  |        |        |        |
| <i>Snca</i> Cast   | 0.025  |        |        |        |

**Supplementary Table 2: P-values of the likelihood ratio tests.**

P-values of the likelihood ratio test for each increment of the number of components. A small p-value indicates that likelihood improvement is large enough and is unlikely explained by noise in the data.



| Gene        | Component | Proportion         | Mean                  | Variance                 |
|-------------|-----------|--------------------|-----------------------|--------------------------|
| A2m Cast    | 1         | 17.1 (10.6-29.2)   | 6.08 (3.88 - 12.01)   | 12.66 (3.89 - 59.62)     |
| A2m Cast    | 2         | 63.7 (39.8-74.2)   | 49.1 (34.9 - 57.1)    | 426 (192 - 515)          |
| A2m Cast    | 3         | 18.23 (9.44-40.98) | 88.1 (75.9 - 92.7)    | 44.1 (21.2 - 174.8)      |
| Acyp2 Cast  | 1         | 37.5 (30.3-44.2)   | 2.41 (2.00 - 2.85)    | 2.34 (1.65 - 3.81)       |
| Acyp2 Cast  | 2         | 27.7 (17.2-37.9)   | 23.9 (13.9 - 33.6)    | 191.7 (43.1 - 352.1)     |
| Acyp2 Cast  | 3         | 29.3 (20.0-40.2)   | 58.1 (53.4 - 60.0)    | 27.6 (13.4 - 98.3)       |
| Acyp2 Cast  | 4         | 5.67 (2.37-8.53)   | 97.0 (93.8 - 98.5)    | 4.525 (0.469 - 37.818)   |
| App Cast    | 1         | 100 (100-100)      | 51.9 (50.9 - 52.7)    | 16.7 (11.2 - 25.3)       |
| Bag3 Cast   | 1         | 22.2 (14.6-29.4)   | 0.899 (0.729 - 1.150) | 0.1066 (0.0267 - 0.3103) |
| Bag3 Cast   | 2         | 56.1 (47.1-64.9)   | 47.2 (43.9 - 49.7)    | 105.9 (49.7 - 214.6)     |
| Bag3 Cast   | 3         | 15.73 (8.93-24.02) | 7.99 (3.62 - 13.54)   | 29.07 (1.27 - 79.04)     |
| Bag3 Cast   | 4         | 5.84 (2.19-10.22)  | 97.1 (95.5 - 98.5)    | 3.856 (0.146 - 6.758)    |
| Cnrip1 Cast | 1         | 29.6 (18.0-41.6)   | 96.6 (96.1 - 97.0)    | 0.3999 (0.0562 - 1.0542) |
| Cnrip1 Cast | 2         | 70.4 (58.4-82.0)   | 60.9 (54.1 - 67.0)    | 515 (322 - 731)          |
| Eya1 Cast   | 1         | 69.0 (53.9-80.1)   | 65.5 (63.1 - 68.3)    | 50.4 (29.1 - 73.2)       |
| Eya1 Cast   | 2         | 31.0 (19.9-46.1)   | 39.6 (36.0 - 45.2)    | 49.6 (22.5 - 114.0)      |
| Eya2 Cast   | 1         | 7.3 (2.4-16.5)     | 55.5 (45.8 - 63.0)    | 50.973 (0.837 - 168.311) |
| Eya2 Cast   | 2         | 92.7 (83.5-97.6)   | 23.1 (20.7 - 25.1)    | 79.9 (56.6 - 107.5)      |
| Eya3 Cast   | 1         | 100 (100-100)      | 40.8 (40.3 - 41.4)    | 4.85 (2.69 - 8.58)       |
| Eya4 Cast   | 1         | 7.18 (3.47-14.06)  | 88.2 (82.9 - 91.0)    | 9.959 (0.797 - 43.568)   |
| Eya4 Cast   | 2         | 82.3 (74.6-88.4)   | 48.0 (44.4 - 51.0)    | 308 (231 - 369)          |
| Eya4 Cast   | 3         | 10.3 (5.8-15.6)    | 9.26 (7.12 - 11.60)   | 9.96 (2.59 - 22.07)      |
| Grik2 Cast  | 1         | 33.3 (19.2-47.1)   | 52.4 (45.5 - 62.6)    | 196.4 (73.7 - 331.0)     |
| Grik2 Cast  | 2         | 27.5 (14.1-42.7)   | 23.1 (17.9 - 29.4)    | 77.6 (13.3 - 151.2)      |
| Grik2 Cast  | 3         | 30.0 (22.6-37.3)   | 2.53 (1.69 - 3.25)    | 4.46 (2.47 - 6.60)       |
| Grik2 Cast  | 4         | 9.08 (5.07-13.37)  | 95.6 (94.4 - 96.8)    | 5.32 (2.35 - 9.29)       |
| Kcnq2 Cast  | 1         | 72.7 (56.6-88.5)   | 33.5 (32.2 - 34.8)    | 13.78 (8.47 - 21.30)     |
| Kcnq2 Cast  | 2         | 27.3 (11.5-43.4)   | 48.4 (44.4 - 54.2)    | 115.54 (5.63 - 260.01)   |
| Ptk2b Cast  | 1         | 100 (100-100)      | 50.7 (47.0 - 54.8)    | 323 (234 - 425)          |
| Snca Cast   | 1         | 100 (100-100)      | 60.4 (57.6 - 63.0)    | 155.5 (94.6 - 241.9)     |

**Supplementary Table 3: Bootstrap estimates of the parameters.**

Table presenting the estimates of the parameters (mean, variance and proportions of clones assigned to each population) for each gene and each component. Values in parenthesis give the 95% confidence intervals estimated via resampling (see Methods).

| NPC clone/Astrocyte - RNAseq | RNAseq reference               | RNAseq library ID (Curie) | NPC clone - ATACseq | ATACseq reference         | Cell type                 |     |
|------------------------------|--------------------------------|---------------------------|---------------------|---------------------------|---------------------------|-----|
| NPC_129 (NPC_XX-1)           | Gendrel et al, 2014 (GSE54016) |                           | NPC_XX2             | Xu et al, 2017 (GSE84646) | NPC                       |     |
| NPC_C2 (NPC_XX-2)            |                                |                           | NPC_XX1             |                           | NPC                       |     |
| NPC_G4 (NPC_XX-3)            |                                |                           | NPC_XX4             |                           | NPC                       |     |
| NPC_E1.2 (NPC_XX-4)          |                                |                           |                     |                           | NPC                       |     |
| NPC_mC3 (NPC_XY-1)           |                                |                           |                     | NPC_XY12                  | Xu et al, 2017 (GSE84646) | NPC |
| NPC_mE6 (NPC_XY-2)           |                                |                           |                     | NPC_XY14                  |                           | NPC |
| NPC_mB4 (NPC_XY-3)           |                                |                           |                     | NPC_XY11                  |                           | NPC |
| NPC_mG3 (NPC_XY-4)           |                                |                           |                     | NPC_XY15                  |                           | NPC |
| NPC_DFT (NPC_D9B2)           | Giorgetti et al, 2016          |                           |                     |                           | NPC                       |     |
| NPC_F5                       | This study (Curie platform)    | B145T30                   | NPC_XX3             | Xu et al, 2017 (GSE84646) | NPC                       |     |
| NPC_mG6                      |                                | B145T32                   | NPC_XY16            |                           | NPC                       |     |
| NPC_mG2                      |                                | B145T31                   |                     |                           | NPC                       |     |
| Ch3_1/Ch3_2                  | This study (Stanford)          |                           | NPC_XY7             | Xu et al, 2017 (GSE84646) | NPC                       |     |
| Ch5_1/Ch5_2                  |                                |                           | NPC_XY8             |                           | NPC                       |     |
| Ch7_1/Ch7_2                  |                                |                           | NPC_XY9             |                           | NPC                       |     |
| Ch8_1/Ch8_2                  |                                |                           | NPC_XY10            |                           | NPC                       |     |
| Astro_129                    | This study (Curie platform)    | A234T12                   |                     |                           | Astrocyte                 |     |
| Astro_mE6                    |                                | A234T13                   |                     |                           | Astrocyte                 |     |
| Astro_mC3                    |                                | A234T14                   |                     |                           | Astrocyte                 |     |
| Astro_C2                     |                                | B129T1                    |                     |                           | Astrocyte                 |     |
| Astro_G4                     |                                | B129T2                    |                     |                           | Astrocyte                 |     |

Supplementary Table 4: List of clones used for sequencing.

|                                     |                                  |                                 |                                              |
|-------------------------------------|----------------------------------|---------------------------------|----------------------------------------------|
| (+)-JQ1                             | Decitabine                       | Mitomycin C                     | RGFP966                                      |
| 2-Methoxyestradiol (2-MeOE2)        | Droxinostat                      | Mizoribine                      | Ricolinostat (ACY-1215)                      |
| 3-deazaneplanocin A (DZNeP) HCl     | EI1                              | MK-5108 (VX-689)                | Roxadustat (FG-4592)                         |
| 4SC-202                             | Ellagic acid                     | ML324                           | Rucaparib (AG-014699,PF-01367338) phosphate  |
| A-366                               | ENMD-2076                        | MLN8054                         | Ruxolitinib (INCB018424)                     |
| Abexinostat (PCI-24781)             | ENMD-2076 L-(+)-Tartaric acid    | MM-102                          | RVX-208                                      |
| AG-14361                            | Entacapone                       | Mocetinostat (MGCD0103)         | Scriptaid                                    |
| AG-490 (Tyrphostin B42)             | Entinostat (MS-275)              | Momelotinib (CYT387)            | Selisistat (EX 527)                          |
| Alisertib (MLN8237)                 | EPZ004777                        | MS023                           | SGC 0946                                     |
| AMG-900                             | EPZ011989                        | MS436                           | SGC707                                       |
| Anacardic Acid                      | EPZ015666(GSK3235025)            | Nedaplatin                      | SGC-CBP30                                    |
| APTSTAT3-9R                         | Fedratinib (SAR302503, TG101348) | Nexturastat A                   | SGI-1027                                     |
| AR-42                               | Filgotinib (GLPG0634)            | Niraparib (MK-4827) tosylate    | SGI-1776 free base                           |
| AT9283                              | Gandotinib (LY2784544)           | Norfloxacin                     | Sirtinol                                     |
| Aurora A Inhibitor I                | Gemcitabine HCl                  | NVP-BSK805 2HCl                 | SMI-4a                                       |
| AZ 960                              | Givinostat (ITF2357)             | NVP-TNKS656                     | SNS-314 Mesylate                             |
| AZ6102                              | GSK J1                           | Oclacitinib                     | Sodium Phenylbutyrate                        |
| Azacitidine                         | GSK J4 HCl                       | OF-1                            | SP2509                                       |
| AZD1208                             | GSK1070916                       | Ofloxacin                       | SRT1720 HCl                                  |
| AZD1480                             | GSK1324726A (I-BET726)           | OG-L002                         | S-Ruxolitinib (INCB018424)                   |
| AZD2461                             | GSK2801                          | Olaparib (AZD2281, Ku-0059436)  | Tacedinaline (CI994)                         |
| Barasertib (AZD1152-HQPA)           | GSK2879552 2HCl                  | ORY-1001 (RG-6016) 2HCl         | TAK-901                                      |
| Baricitinib (LY3009104, INCB028050) | GSK503                           | OTX015                          | TG101209                                     |
| Belinostat (PXD101)                 | GSK591                           | Pacritinib (SB1518)             | TMP269                                       |
| BI-7273                             | GSK-LSD1 2HCl                    | Panobinostat (LBH589)           | Tofacitinib (CP-690550) Citrate              |
| BIX 01294                           | Hesperadin                       | PCI-34051                       | Tofacitinib (CP-690550, Tasocitinib)         |
| Blasticidin S HCl                   | HLCL-61 HCL                      | PF-CBP1 HCl                     | Tozasertib (VX-680, MK-0457)                 |
| BRD4770                             | I-BET-762                        | PFI-1 (PF-6405761)              | Tranylcypromine (2-PCPA) HCl                 |
| Bromosporine                        | I-BRD9                           | PFI-2 HCl                       | Trichostatin A (TSA)                         |
| C646                                | Iniparib (BSI-201)               | PFI-3                           | Tubastatin A                                 |
| Carboplatin                         | INO-1001 (3-Aminobenzamide)      | PHA-680632                      | Tubastatin A HCl                             |
| CEP-33779                           | IOX1                             | Pinometostat (EPZ5676)          | UNC0379                                      |
| Clevudine                           | IOX2                             | Pirarubicin                     | UNC0631                                      |
| CPI-169                             | ITSA-1 (ITSA1)                   | PJ34                            | UNC1215                                      |
| CPI-203                             | JIB-04                           | PJ34 HCl                        | UNC669                                       |
| CPI-360                             | JNJ-7706621                      | Pracinostat (SB939)             | UPF 1069                                     |
| CUDC-101                            | KW-2449                          | Procainamide HCl                | Valproic acid sodium salt (Sodium valproate) |
| CUDC-907                            | Lomeguatrib                      | Procarbazine HCl                | Veliparib (ABT-888)                          |
| CX-6258 HCl                         | M344                             | Quercetin                       | Vorinostat (SAHA, MK0683)                    |
| CYC116                              | MC1568                           | Quisinostat (JNJ-26481585) 2HCl | WHI-P154                                     |
| Cytarabine                          | ME0328                           | Remodelin                       | WP1066                                       |
| Dacinostat (LAQ824)                 | MG149                            | Resminostat                     | XL019                                        |
| Danusertib (PHA-739358)             | MI-2 (Menin-MLL Inhibitor)       | Resveratrol                     | Zebularine                                   |
| Daphnetin                           | MI-3 (Menin-MLL Inhibitor)       | RG108                           | ZM 39923 HCl                                 |
| Daptomycin                          | Mirin                            | RG2833 (RGFP109)                | ZM 447439                                    |
| Decernotinib (VX-509)               |                                  |                                 |                                              |

Supplementary Table 5: List of compounds used in the screen.

| Gene          | Primer name                                     | Modification | Primer sequence                                                             | Product size (bp) | SNP ID                      |
|---------------|-------------------------------------------------|--------------|-----------------------------------------------------------------------------|-------------------|-----------------------------|
| <i>A2m</i>    | A2M_F1<br>A2M_R1<br>A2M_S1                      | Biot         | CAGAGCTCAGAAACCCAGAGTG<br>GGAGCACATAAGCGGTCATC<br>GGTCATCTCTACCTCAGC        | 89                | rs260691801                 |
| <i>Acyp2</i>  | Acyp2_pyro-F<br>Acyp2_pyro-R<br>Acyp2_pyro-S    | Biot         | ACACTTTCCATTTTTAACTCTCCT<br>GTATTCGATATTAATGGAAGAAAA<br>AAAATAAACATTCTTAGAT | 105               | rs48601327                  |
| <i>App</i>    | App_F1<br>App_R1<br>App_S1                      | Biot         | CTGGTGTAGGAACCTTGCCTTGT<br>TACGCGAATGATACAGGTCCA<br>CGCCCTTCTCGTGCC         | 96                | rs48007435                  |
| <i>Bag3</i>   | Bag3_pyro-F<br>Bag3_pyro-R<br>Bag3_pyro-S       | Biot         | TGCCCATCTCCCATCCGT<br>TTCGGGTTGGGTAACAGGTG<br>GCTGAGGCCTGTCAAC              | 87                | rs31544462                  |
| <i>Cnrip1</i> | Cnrip1_pyro-F<br>Cnrip1_pyro-R<br>Cnrip1_pyro-S | Biot         | TCAGTGAAGTAGCAGGTTTGTC<br>GGGACTCCAGCACATTGTTATC<br>TCTTGAACAAAACACC        | 129               | rs26873596                  |
| <i>Eya1</i>   | Eya1_pyro-F<br>Eya1_pyro-R<br>Eya1_pyro-S       | Biot         | TGTTTCTGATGATGGCCAGACC<br>CACCCAGACAAGGTTTATTGC<br>AGACCAACCCACCAT          | 56                | rs229395946                 |
| <i>Eya2</i>   | Eya2_pyro-F<br>Eya2_pyro-R<br>Eya2_pyro-S       | Biot         | ATTTATGGACTGCACCCGTTACTC<br>AAACCAGACCTACAGCCGAGAA<br>ACCCGTTACTCCCAT       | 75                | rs220343389                 |
| <i>Eya3</i>   | Eya3_pyro-F<br>Eya3_pyro-R<br>Eya3_pyro-S       | Biot         | TCGGTGCTGTCTGGAAGA<br>TACCTGGGGAGAGTGAGGAATG<br>AGGAATGAGGCCCAA             | 76                | rs13466257                  |
| <i>Eya4</i>   | Eya4_pyro-F<br>Eya4_pyro-R<br>Eya4_pyro-S       | Biot         | GCAGGCAATTGTTTCAGCA<br>GGGTCTTCCCGTTACAGACA<br>CCCGTTACAGACAGGA             | 66                | rs46855682                  |
| <i>Grik2</i>  | Grik2_F1<br>Grik2_R1<br>Grik2_S1                | Biot         | AGGAAGGGAGGAACCCATGATAA<br>CTCATGCCGCTGTGTCTATGAAC<br>TGTAACCCCGTGTAACCT    | 134               | rs248603850<br>rs2461479928 |
| <i>Kcnq2</i>  | Kcnq2_F1<br>Kcnq2_R1<br>Kcnq2_S1                | Biot         | TGTGAGCGTAGACTACCGATCCC<br>TGGTTCACAGGGCAATGTCT<br>GTGGCACCTGGAAGC          | 131               | rs27642401                  |
| <i>Ptk2b</i>  | Ptk2b_F1<br>Ptk2b_R1<br>Ptk2b_S1                | Biot         | CCTCCGACTCTCTGCTTCTTCC<br>AGGGGACAGAGAGGGGTTTTAT<br>TACTACTGTACAAGAGAGC     | 211               | rs257352928                 |
| <i>Snca</i>   | Snca_F1<br>Snca_R1<br>Snca_S1                   | Biot         | GCTCCCTAGGCTTCTGAAGAACTC<br>AGCAGACGGCAGGAGACCA<br>CTGCCCTTGCCTCTT          | 117               | rs225467378                 |

Supplementary Table 6: List of pyrosequencing primers.

| Gene         | Primer name | Primer sequence       | Tm (°C) | Product size (bp) |
|--------------|-------------|-----------------------|---------|-------------------|
| <i>Acyp2</i> | Acyp2_RT_F  | CTGTTGGCTGGGTGAAGAA   | 60.18   | 97                |
|              | Acyp2_RT_R  | TGCTCAGCCAGGACTTCATG  | 60.04   |                   |
| <i>Bag3</i>  | Bag3_RT_F   | AGCCGCCCAGACAGATAAAC  | 60.11   | 109               |
|              | Bag3_RT_R   | GGCAGCTGGAGACTGAGATC  | 59.90   |                   |
| <i>Eya3</i>  | Eya3_RT_F   | CCAGACGGAGAAGCCTAGTG  | 59.54   | 199               |
|              | Eya3_RT_R   | CCGTTCCAATTCACCTGTCCT | 57.81   |                   |
| <i>Rrm2</i>  | Rrm2-RT_F   | CCGAGCTGGAAAGTAAAGCG  | 59.28   | 91                |
|              | Rrm2-RT_R   | ATGGGAAAGACAACGAAGCG  | 58.84   |                   |
| <i>B2m</i>   | B2m_F       | ACCCGCCTCACATTGAAATCC | 60.96   | 199               |
|              | B2m_R       | CGATCCCAGTAGACGGTCTTG | 59.93   |                   |
| <i>Gapdh</i> | Gapdh_RT_F  | TGACGTGCCGCTGGAGAAAC  | 65.48   | 160               |
|              | Gapdh_RT_R  | CCGGCATCGAAGGTGGAAGAG | 63.08   |                   |

**Supplementary Table 7: List of qPCR primers.**

| Gene         | Primer name | Primer sequence                                          | Ta   | Product size (bp) | # of CpG |
|--------------|-------------|----------------------------------------------------------|------|-------------------|----------|
| <i>Acyp2</i> | Acyp2_BS_F  | AGGAAGAGAGAAATGGATGGTATAAGTTTTTTTTT                      | 71.0 | 406               | 27       |
|              | Acyp2_BS_R  | CAGTAATACGACTCACTATAGGGAGAAGGCTAATTAATTTAATCCCCTCACATACC |      |                   |          |
| <i>Bag3</i>  | Bag3_BS_F   | AGGAAGAGAGGGTTTTAAGGTGAGTGGAGTTTGT                       | 72.6 | 422               | 41       |
|              | Bag3_BS_R   | CAGTAATACGACTCACTATAGGGAGAAGGCTACTCAACAACCTTTCAATCCTAAC  |      |                   |          |

**Supplementary Table 8: List of bisulfite primers.**
